# Supplementary material for: Anaplasma phagocytophilum and Other Anaplasma spp. in Various Hosts in the Mnisi Community, Mpumalanga Province, South Africa
Source: PubMed Central journal article supplement (PMC7698776; doi:10.3390/microorganisms8111812), 2020-11-18
Supplement: microorganisms-08-01812-s001.pdf [file microorganisms-08-01812-s001.pdf]

**Table S1:** List of rodent species captured from the three habitat areas.

| <b>Sample ID</b> | <b>Collection Date</b> | <b>Sampling Locality</b> | <b>Morphological Identification</b> |
|------------------|------------------------|--------------------------|-------------------------------------|
| R1               | 2015/09/07             | Tlhavekisa               | <i>Mastomys</i> sp.                 |
| R2               | 2015/09/07             | Tlhavekisa               | <i>Mastomys coucha</i>              |
| R3               | 2015/09/07             | Tlhavekisa               | <i>Mastomys</i> sp.                 |
| R4               | 2015/09/07             | Tlhavekisa               | <i>Mastomys</i> sp.                 |
| R5               | 2015/09/07             | Tlhavekisa               | <i>Mastomys coucha</i>              |
| R6               | 2015/09/07             | Tlhavekisa               | <i>Mastomys coucha</i>              |
| R7               | 2015/09/07             | Tlhavekisa               | <i>Gerbilliscus leucogaster</i>     |
| R8               | 2015/09/07             | Tlhavekisa               | <i>Saccostomus campestris</i>       |
| R9               | 2015/09/08             | Tlhavekisa               | <i>Mastomys</i> sp.                 |
| R10              | 2015/09/08             | Tlhavekisa               | <i>Mastomys</i> sp.                 |
| R11              | 2015/09/08             | Tlhavekisa               | <i>Mastomys coucha</i>              |
| R12              | 2015/09/08             | Tlhavekisa               | <i>Mastomys coucha</i>              |
| R13              | 2015/09/08             | Manyeleti                | <i>Gerbilliscus leucogaster</i>     |
| R14              | 2015/09/08             | Manyeleti                | <i>Gerbilliscus leucogaster</i>     |
| R15              | 2015/09/08             | Manyeleti                | <i>Gerbilliscus leucogaster</i>     |
| R16              | 2015/09/08             | Manyeleti                | <i>Mastomys</i> sp.                 |
| R17              | 2015/09/09             | Tlhavekisa               | <i>Gerbilliscus leucogaster</i>     |
| R18              | 2015/09/09             | Gottenburg               | <i>Mastomys</i> sp.                 |
| R19              | 2015/09/09             | Gottenburg               | <i>Mastomys natalensis</i>          |
| R20              | 2015/09/09             | Gottenburg               | <i>Mastomys natalensis</i>          |
| R21              | 2015/09/09             | Manyeleti                | <i>Mastomys coucha</i>              |
| R22              | 2015/09/09             | Manyeleti                | <i>Saccostomus campestris</i>       |
| R23              | 2015/09/09             | Manyeleti                | <i>Aethomys</i> sp.                 |
| R24              | 2015/09/09             | Manyeleti                | <i>Aethomys</i> sp.                 |
| R25              | 2015/09/09             | Manyeleti                | <i>Gerbilliscus leucogaster</i>     |
| R26              | 2015/09/09             | Manyeleti                | <i>Mastomys</i> sp.                 |
| R27              | 2015/09/09             | Manyeleti                | <i>Aethomys</i> sp.                 |
| R28              | 2015/09/09             | Manyeleti                | <i>Gerbilliscus leucogaster</i>     |
| R29              | 2015/09/10             | Gottenburg               | <i>Mastomys natalensis</i>          |
| R30              | 2015/09/10             | Gottenburg               | <i>Mastomys natalensis</i>          |
| R31              | 2015/09/10             | Gottenburg               | <i>Mastomys natalensis</i>          |
| R32              | 2015/09/10             | Gottenburg               | <i>Lemniscomys rosalia</i>          |
| R33              | 2015/09/10             | Hlalakahle               | <i>Saccostomus campestris</i>       |
| R34              | 2015/09/10             | Gottenburg               | <i>Mastomys</i> sp.                 |
| R35              | 2015/09/10             | Hlalakahle               | <i>Saccostomus campestris</i>       |
| R36              | 2015/09/10             | Hlalakahle               | <i>Gerbilliscus leucogaster</i>     |
| R37              | 2015/09/10             | Gottenburg               | <i>Mastomys</i> sp.                 |
| R38              | 2015/09/10             | Gottenburg               | <i>Mastomys</i> sp.                 |
| R39              | 2015/09/10             | Gottenburg               | <i>Rattus</i> sp.                   |
| R40              | 2015/09/10             | Gottenburg               | <i>Mastomys</i> sp.                 |

|     |            |            |                                 |
|-----|------------|------------|---------------------------------|
| R41 | 2015/09/10 | Gottenburg | <i>Lemniscomys rosalia</i>      |
| R42 | 2015/09/10 | Gottenburg | <i>Mastomys</i> sp.             |
| R43 | 2015/09/10 | Gottenburg | <i>Mastomys</i> sp.             |
| R44 | 2015/09/10 | Gottenburg | <i>Gerbilliscus leucogaster</i> |
| R45 | 2015/09/10 | Gottenburg | <i>Mastomys</i> sp.             |
| R46 | 2015/09/10 | Gottenburg | <i>Mastomys</i> sp.             |
| R47 | 2015/09/10 | Gottenburg | <i>Mastomys</i> sp.             |
| R48 | 2015/09/11 | Manyeleti  | <i>Saccostomus campestris</i>   |
| R49 | 2015/09/11 | Manyeleti  | <i>Aethomys</i> sp.             |
| R50 | 2015/09/11 | Manyeleti  | <i>Mastomys</i> sp.             |
| R51 | 2015/09/11 | Manyeleti  | <i>Gerbilliscus leucogaster</i> |
| R52 | 2015/09/12 | Manyeleti  | <i>Saccostomus campestris</i>   |
| R53 | 2015/09/12 | Manyeleti  | <i>Mastomys coucha</i>          |
| R54 | 2015/09/12 | Manyeleti  | <i>Saccostomus campestris</i>   |
| R55 | 2015/09/12 | Manyeleti  | <i>Saccostomus campestris</i>   |
| R56 | 2015/09/12 | Manyeleti  | <i>Steatomys</i> sp.            |
| R57 | 2015/09/12 | Manyeleti  | <i>Aethomys</i> sp.             |
| R58 | 2015/09/12 | Manyeleti  | <i>Mus minutoides</i>           |
| R59 | 2015/09/12 | Manyeleti  | <i>Gerbilliscus leucogaster</i> |
| R60 | 2015/09/12 | Manyeleti  | <i>Gerbilliscus leucogaster</i> |
| R61 | 2015/09/12 | Manyeleti  | <i>Mastomys coucha</i>          |
| R62 | 2015/09/12 | Manyeleti  | <i>Steatomys</i> sp.            |
| R63 | 2015/09/12 | Hlalakahle | <i>Gerbilliscus leucogaster</i> |
| R64 | 2015/09/12 | Hlalakahle | <i>Mus minutoides</i>           |
| R65 | 2015/09/12 | Hlalakahle | <i>Gerbilliscus leucogaster</i> |
| R66 | 2015/09/12 | Hlalakahle | <i>Saccostomus campestris</i>   |
| R67 | 2015/09/16 | Gottenburg | <i>Mastomys</i> sp.             |
| R68 | 2015/09/16 | Gottenburg | <i>Mastomys</i> sp.             |
| R69 | 2015/09/16 | Gottenburg | <i>Aethomys</i> sp.             |
| R70 | 2015/09/16 | Gottenburg | <i>Mastomys</i> sp.             |
| R71 | 2015/09/16 | Hlalakahle | <i>Mastomys</i> sp.             |
| R72 | 2015/09/16 | Hlalakahle | <i>Mastomys</i> sp.             |
| R73 | 2015/09/16 | Hlalakahle | <i>Mastomys</i> sp.             |
| R74 | 2015/09/16 | Hlalakahle | <i>Mastomys natalensis</i>      |
| R75 | 2015/09/16 | Hlalakahle | <i>Mastomys natalensis</i>      |
| R76 | 2015/09/16 | Hlalakahle | <i>Aethomys</i> sp.             |
| R77 | 2015/09/16 | Hlalakahle | <i>Mastomys</i> sp.             |
| R78 | 2015/09/16 | Hlalakahle | <i>Mastomys natalensis</i>      |
| R79 | 2015/09/16 | Hlalakahle | <i>Mastomys</i> sp.             |
| R80 | 2015/09/16 | Hlalakahle | <i>Mastomys</i> sp.             |
| R81 | 2015/09/16 | Hlalakahle | <i>Mastomys</i> sp.             |
| R82 | 2015/09/16 | Hlalakahle | <i>Mastomys</i> sp.             |
| R83 | 2015/09/14 | Tlhavekisa | <i>Mastomys</i> sp.             |
| R84 | 2015/09/14 | Tlhavekisa | <i>Mastomys natalensis</i>      |

|      |            |            |                                 |
|------|------------|------------|---------------------------------|
| R85  | 2015/09/14 | Tlhavekisa | <i>Rattus</i> sp.               |
| R86  | 2015/09/14 | Tlhavekisa | <i>Mastomys</i> sp.             |
| R87  | 2015/09/16 | Tlhavekisa | <i>Rattus</i> sp.               |
| R88  | 2015/09/16 | Tlhavekisa | <i>Mastomys</i> sp.             |
| R89  | 2015/09/16 | Tlhavekisa | <i>Rattus</i> sp.               |
| R90  | 2015/09/16 | Tlhavekisa | <i>Rattus</i> sp.               |
| R91  | 2015/09/16 | Gottenburg | <i>Mastomys</i> sp.             |
| R92  | 2015/09/16 | Gottenburg | <i>Mastomys</i> sp.             |
| R93  | 2015/09/17 | Tlhavekisa | <i>Rattus</i> sp.               |
| R94  | 2015/09/17 | Tlhavekisa | <i>Mastomys</i> sp.             |
| R95  | 2015/09/17 | Hlalakahle | <i>Mastomys natalensis</i>      |
| R96  | 2015/09/17 | Hlalakahle | <i>Mastomys</i> sp.             |
| R97  | 2015/09/17 | Hlalakahle | <i>Mastomys</i> sp.             |
| R98  | 2015/09/17 | Hlalakahle | <i>Mastomys natalensis</i>      |
| R99  | 2015/09/17 | Hlalakahle | <i>Mastomys natalensis</i>      |
| R100 | 2015/09/17 | Hlalakahle | <i>Mastomys</i> sp.             |
| R101 | 2015/09/17 | Hlalakahle | <i>Mastomys</i> sp.             |
| R102 | 2015/04/01 | Tlhavekisa | <i>Rattus tanezumi</i>          |
| R103 | 2015/04/01 | Tlhavekisa | <i>Mastomys natalensis</i>      |
| R104 | 2015/01/04 | Tlhavekisa | <i>Mastomys natalensis</i>      |
| R105 | 2015/01/04 | Tlhavekisa | <i>Mastomys natalensis</i>      |
| R106 | 2015/01/04 | Tlhavekisa | <i>Rattus rattus</i>            |
| R107 | 2015/01/04 | Tlhavekisa | <i>Rattus rattus</i>            |
| R108 | 2015/01/04 | Tlhavekisa | <i>Rattus rattus</i>            |
| R109 | 2015/01/04 | Tlhavekisa | <i>Rattus rattus</i>            |
| R110 | 2015/01/04 | Hlalakahle | <i>Rattus tanezumi</i>          |
| R111 | 2015/01/04 | Hlalakahle | <i>Mastomys</i> sp.             |
| R112 | 2015/01/04 | Hlalakahle | <i>Saccostomus campestris</i>   |
| R113 | 2015/01/04 | Hlalakahle | <i>Rattus tanezumi</i>          |
| R114 | 2015/01/04 | Tlhavekisa | <i>Mastomys</i> sp.             |
| R115 | 2015/01/04 | Tlhavekisa | <i>Mastomys</i> sp.             |
| R116 | 2015/01/04 | Hlalakahle | <i>Aethomys</i> sp.             |
| R117 | 2015/01/04 | Hlalakahle | <i>Gerbilliscus leucogaster</i> |
| R118 | 2015/01/04 | Hlalakahle | <i>Saccostomus campestris</i>   |
| R119 | 2015/01/04 | Hlalakahle | <i>Mastomys</i> sp.             |
| R120 | 2015/01/04 | Hlalakahle | <i>Saccostomus campestris</i>   |
| R121 | 2015/01/04 | Hlalakahle | <i>Gerbilliscus leucogaster</i> |
| R122 | 2015/01/04 | Hlalakahle | <i>Aethomys</i> sp.             |
| R123 | 2015/01/04 | Hlalakahle | <i>Saccostomus campestris</i>   |
| R124 | 2015/01/04 | Hlalakahle | <i>Saccostomus campestris</i>   |
| R125 | 2015/01/04 | Hlalakahle | <i>Gerbilliscus leucogaster</i> |
| R126 | 2015/01/04 | Hlalakahle | <i>Gerbilliscus leucogaster</i> |
| R127 | 2015/01/04 | Hlalakahle | <i>Saccostomus campestris</i>   |
| R128 | 2015/01/04 | Hlalakahle | <i>Gerbilliscus leucogaster</i> |

|      |            |            |                                 |
|------|------------|------------|---------------------------------|
| R129 | 2015/01/04 | Hlalakahle | <i>Gerbilliscus leucogaster</i> |
| R130 | 2015/01/04 | Hlalakahle | <i>Gerbilliscus leucogaster</i> |
| R131 | 2015/01/04 | Hlalakahle | <i>Saccostomus campestris</i>   |
| R132 | 2015/01/04 | Gottenburg | <i>Saccostomus campestris</i>   |
| R133 | 2015/01/04 | Gottenberg | <i>Saccostomus campestris</i>   |
| R134 | 2015/01/04 | Gottenberg | <i>Aethomys</i> sp.             |
| R135 | 2015/01/04 | Gottenberg | <i>Aethomys</i> sp.             |
| R136 | 2015/01/04 | Hlalakahle | <i>Gerbilliscus leucogaster</i> |
| R137 | 2015/01/04 | Hlalakahle | <i>Saccostomus campestris</i>   |
| R138 | 2015/01/04 | Hlalakahle | <i>Gerbilliscus leucogaster</i> |
| R139 | 2015/01/04 | Hlalakahle | <i>Gerbilliscus leucogaster</i> |
| R140 | 2015/01/04 | Gottenburg | <i>Mastomys</i> sp.             |
| R141 | 2015/01/04 | Gottenburg | <i>Aethomys</i> sp.             |
| R142 | 2015/01/04 | Gottenburg | <i>Aethomys</i> sp.             |
| R143 | 2015/01/04 | Gottenburg | <i>Mastomys</i> sp.             |
| R144 | 2015/01/04 | Gottenburg | <i>Mastomys</i> sp.             |
| R145 | 2015/01/04 | Gottenburg | <i>Mastomys</i> sp.             |
| R146 | 2015/01/04 | Gottenburg | <i>Mastomys</i> sp.             |
| R147 | 2015/01/04 | Gottenburg | <i>Mastomys</i> sp.             |
| R148 | 2015/01/04 | Manyeleti  | <i>Aethomys</i> sp.             |
| R149 | 2015/01/04 | Manyeleti  | <i>Saccostomus campestris</i>   |
| R150 | 2015/01/04 | Manyeleti  | <i>Gerbilliscus leucogaster</i> |
| R151 | 2015/01/04 | Gottenburg | <i>Mastomys</i> sp.             |
| R152 | 2015/01/04 | Gottenburg | <i>Mastomys</i> sp.             |
| R153 | 2015/01/04 | Gottenburg | <i>Mastomys</i> sp.             |
| R154 | 2015/01/04 | Gottenburg | <i>Mastomys</i> sp.             |
| R155 | 2015/01/04 | Gottenburg | <i>Mastomys</i> sp.             |
| R156 | 2015/01/04 | Manyeleti  | <i>Gerbilliscus leucogaster</i> |
| R157 | 2015/01/04 | Manyeleti  | <i>Saccostomus campestris</i>   |
| R158 | 2015/01/04 | Manyeleti  | <i>Saccostomus campestris</i>   |
| R159 | 2015/01/04 | Manyeleti  | <i>Mastomys coucha</i>          |
| R160 | 2015/01/04 | Gottenburg | <i>Mastomys</i> sp.             |
| R161 | 2015/01/04 | Gottenburg | <i>Mastomys</i> sp.             |
| R162 | 2015/01/04 | Gottenburg | <i>Mastomys</i> sp.             |
| R163 | 2015/01/04 | Gottenburg | <i>Mastomys</i> sp.             |
| R164 | 2015/01/04 | Gottenburg | <i>Mastomys</i> sp.             |
| R165 | 2015/01/04 | Gottenburg | <i>Mastomys</i> sp.             |
| R166 | 2015/01/04 | Gottenburg | <i>Mastomys</i> sp.             |
| R167 | 2015/01/04 | Gottenburg | <i>Mastomys</i> sp.             |
| R168 | 2015/01/04 | Gottenburg | <i>Rattus rattus</i>            |
| R169 | 2015/01/04 | Gottenburg | <i>Mastomys</i> sp.             |
| R170 | 2015/01/04 | Gottenburg | <i>Rattus rattus</i>            |
| R171 | 2015/01/04 | Gottenburg | <i>Mastomys natalensis</i>      |
| R172 | 2015/01/04 | Gottenburg | <i>Mastomys natalensis</i>      |

|      |            |            |                                 |
|------|------------|------------|---------------------------------|
| R173 | 2015/01/04 | Gottenburg | <i>Mastomys</i> sp.             |
| R174 | 2015/01/04 | Gottenburg | <i>Rattus rattus</i>            |
| R175 | 2015/01/04 | Gottenburg | <i>Mastomys</i> sp.             |
| R176 | 2015/01/04 | Manyeleti  | <i>Gerbilliscus leucogaster</i> |
| R177 | 2015/01/04 | Manyeleti  | <i>Mastomys coucha</i>          |
| R178 | 2015/01/04 | Manyeleti  | <i>Gerbilliscus leucogaster</i> |
| R179 | 2015/01/04 | Manyeleti  | <i>Mastomys coucha</i>          |
| R180 | 2015/01/04 | Manyeleti  | <i>Mastomys</i> sp.             |
| R181 | 2015/01/04 | Manyeleti  | <i>Steatomys</i> sp.            |
| R182 | 2015/01/04 | Manyeleti  | <i>Mastomys</i> sp.             |
| R183 | 2015/01/04 | Manyeleti  | <i>Gerbilliscus leucogaster</i> |
| R184 | 2015/01/04 | Manyeleti  | <i>Gerbilliscus leucogaster</i> |
| R185 | 2014/07/29 | Manyeleti  | <i>Mastomys</i> sp.             |
| R186 | 2014/07/29 | Manyeleti  | <i>Mastomys</i> sp.             |
| R187 | 2014/07/29 | Manyeleti  | <i>Gerbilliscus leucogaster</i> |
| R188 | 2014/07/29 | Manyeleti  | <i>Mastomys</i> sp.             |
| R189 | 2014/07/29 | Manyeleti  | <i>Mastomys</i> sp.             |
| R190 | 2014/07/29 | Manyeleti  | <i>Mastomys</i> sp.             |
| R191 | 2014/07/29 | Manyeleti  | <i>Gerbilliscus leucogaster</i> |
| R192 | 2014/07/29 | Manyeleti  | <i>Gerbilliscus leucogaster</i> |
| R193 | 2014/07/29 | Manyeleti  | <i>Mastomys</i> sp.             |
| R194 | 2014/07/29 | Manyeleti  | <i>Mastomys</i> sp.             |
| R195 | 2014/07/29 | Manyeleti  | <i>Mastomys</i> sp.             |
| R196 | 2014/07/29 | Manyeleti  | <i>Mastomys</i> sp.             |
| R197 | 2014/07/29 | Manyeleti  | <i>Mastomys</i> sp.             |
| R198 | 2014/07/29 | Manyeleti  | <i>Gerbilliscus leucogaster</i> |
| R199 | 2014/07/29 | Manyeleti  | <i>Gerbilliscus leucogaster</i> |
| R200 | 2014/07/29 | Manyeleti  | <i>Gerbilliscus leucogaster</i> |
| R201 | 2014/07/31 | Manyeleti  | <i>Gerbilliscus leucogaster</i> |
| R202 | 2014/07/31 | Manyeleti  | <i>Gerbilliscus leucogaster</i> |
| R203 | 2014/07/31 | Manyeleti  | <i>Gerbilliscus leucogaster</i> |
| R204 | 2014/07/31 | Manyeleti  | <i>Gerbilliscus leucogaster</i> |
| R205 | 2014/07/30 | Manyeleti  | <i>Aethomys chrysophilus</i>    |
| R206 | 2014/07/30 | Manyeleti  | <i>Aethomys chrysophilus</i>    |
| R207 | 2014/07/30 | Manyeleti  | <i>Gerbilliscus leucogaster</i> |
| R208 | 2014/07/30 | Manyeleti  | <i>Aethomys chrysophilus</i>    |
| R209 | 2014/07/30 | Manyeleti  | <i>Aethomys chrysophilus</i>    |
| R210 | 2014/07/30 | Manyeleti  | <i>Gerbilliscus leucogaster</i> |
| R211 | 2014/07/30 | Manyeleti  | <i>Gerbilliscus leucogaster</i> |
| R212 | 2014/08/01 | Manyeleti  | <i>Lemniscomys rosalis</i>      |
| R213 | 2014/08/01 | Manyeleti  | <i>Gerbilliscus leucogaster</i> |
| R214 | 2014/08/01 | Manyeleti  | <i>Gerbilliscus leucogaster</i> |
| R215 | 2014/08/02 | Manyeleti  | <i>Mus musculus</i>             |
| R216 | 2014/08/02 | Manyeleti  | <i>Mus musculus</i>             |

|      |            |            |                                 |
|------|------------|------------|---------------------------------|
| R217 | 2014/07/29 | Hluvukani  | <i>Mus musculus</i>             |
| R218 | 2014/07/29 | Hluvukani  | <i>Gerbilliscus leucogaster</i> |
| R219 | 2014/07/29 | Hluvukani  | <i>Gerbilliscus leucogaster</i> |
| R220 | 2014/07/29 | Manyeleti  | <i>Aethomys chrysophilus</i>    |
| R221 | 2014/07/31 | Manyeleti  | <i>Aethomys chrysophilus</i>    |
| R222 | 2014/07/31 | Gottenburg | <i>Aethomys chrysophilus</i>    |
| R223 | 2014/07/31 | Gottenburg | <i>Mastomys</i> sp.             |
| R224 | 2014/08/03 | Tlhavakisa | <i>Mus musculus</i>             |
| R225 | 2014/07/29 | Manyeleti  | <i>Mus musculus</i>             |
| R226 | 2014/07/29 | Hluvukani  | <i>Aethomys chrysophilus</i>    |
| R227 | 2014/07/29 | Hluvukani  | <i>Aethomys chrysophilus</i>    |
| R228 | 2014/07/30 | Gottenburg | <i>Rattus rattus</i>            |
| R229 | 2014/07/30 | Gottenburg | <i>Aethomys chrysophilus</i>    |
| R230 | 2014/07/30 | Gottenburg | <i>Aethomys chrysophilus</i>    |
| R231 | 2014/07/30 | Gottenburg | <i>Rattus rattus</i>            |
| R232 | 2014/07/31 | Gottenburg | <i>Aethomys chrysophilus</i>    |
| R233 | 2014/07/31 | Gottenburg | <i>Aethomys chrysophilus</i>    |
| R234 | 2014/07/31 | Gottenburg | <i>Aethomys chrysophilus</i>    |
| R235 | 2014/07/31 | Gottenburg | <i>Aethomys chrysophilus</i>    |
| R236 | 2014/07/31 | Gottenburg | <i>Aethomys chrysophilus</i>    |
| R237 | 2014/07/31 | Gottenburg | <i>Rattus rattus</i>            |
| R238 | 2014/07/31 | Gottenburg | <i>Aethomys chrysophilus</i>    |
| R239 | 2014/07/31 | Gottenburg | <i>Aethomys chrysophilus</i>    |
| R240 | 2014/07/31 | Gottenburg | <i>Aethomys chrysophilus</i>    |
| R241 | 2014/07/31 | Gottenburg | <i>Aethomys chrysophilus</i>    |
| R242 | 2014/07/31 | Gottenburg | <i>Aethomys chrysophilus</i>    |
| R243 | 2014/07/30 | Gottenburg | <i>Aethomys chrysophilus</i>    |
| R244 | 2014/07/30 | Gottenburg | <i>Aethomys chrysophilus</i>    |
| R245 | 2014/07/30 | Gottenburg | <i>Rattus rattus</i>            |
| R246 | 2014/07/30 | Gottenburg | <i>Aethomys chrysophilus</i>    |
| R247 | 2014/07/30 | Gottenburg | <i>Rattus rattus</i>            |
| R248 | 2014/07/30 | Gottenburg | <i>Aethomys chrysophilus</i>    |
| R249 | 2014/08/01 | Gottenburg | <i>Aethomys chrysophilus</i>    |
| R250 | 2014/08/01 | Gottenburg | <i>Aethomys chrysophilus</i>    |
| R251 | 2014/08/01 | Gottenburg | <i>Aethomys chrysophilus</i>    |
| R252 | 2014/08/01 | Gottenburg | <i>Aethomys chrysophilus</i>    |
| R253 | 2014/08/01 | Gottenburg | <i>Aethomys chrysophilus</i>    |
| R254 | 2014/08/01 | Gottenburg | <i>Aethomys chrysophilus</i>    |
| R255 | 2014/08/01 | Gottenburg | <i>Rattus rattus</i>            |
| R256 | 2014/08/01 | Gottenburg | <i>Aethomys chrysophilus</i>    |
| R257 | 2014/08/01 | Gottenburg | <i>Aethomys chrysophilus</i>    |
| R258 | 2014/08/01 | Gottenburg | <i>Aethomys chrysophilus</i>    |
| R259 | 2014/08/02 | Gottenburg | <i>Aethomys chrysophilus</i>    |
| R260 | 2014/08/02 | Gottenburg | <i>Aethomys chrysophilus</i>    |

|      |            |            |                              |
|------|------------|------------|------------------------------|
| R261 | 2014/08/02 | Gottenburg | <i>Aethomys chrysophilus</i> |
| R262 | 2014/08/02 | Gottenburg | <i>Rattus rattus</i>         |
| R263 | 2014/08/03 | Gottenburg | <i>Aethomys chrysophilus</i> |
| R264 | 2014/08/03 | Gottenburg | <i>Aethomys chrysophilus</i> |
| R265 | 2014/08/03 | Gottenburg | <i>Aethomys chrysophilus</i> |
| R266 | 2014/08/03 | Gottenburg | <i>Aethomys chrysophilus</i> |
| R267 | 2014/08/03 | Gottenburg | <i>Rattus rattus</i>         |
| R268 | 2014/08/04 | Gottenburg | <i>Rattus rattus</i>         |
| R269 | 2014/08/04 | Gottenburg | <i>Rattus rattus</i>         |
| R270 | 2014/08/04 | Gottenburg | <i>Aethomys chrysophilus</i> |
| R271 | 2014/08/06 | Hlalakahle | <i>Aethomys chrysophilus</i> |
| R272 | 2014/08/06 | Hlalakahle | <i>Aethomys chrysophilus</i> |
| R273 | 2014/08/06 | Hlalakahle | <i>Aethomys chrysophilus</i> |
| R274 | 2014/08/06 | Hlalakahle | <i>Aethomys chrysophilus</i> |
| R275 | 2014/08/06 | Hlalakahle | <i>Aethomys chrysophilus</i> |
| R276 | 2014/08/06 | Hlalakahle | <i>Aethomys chrysophilus</i> |
| R277 | 2014/08/06 | Hlalakahle | <i>Rattus rattus</i>         |
| R278 | 2014/08/06 | Hlalakahle | <i>Aethomys chrysophilus</i> |
| R279 | 2014/08/07 | Hlalakahle | <i>Aethomys chrysophilus</i> |
| R280 | 2014/08/07 | Hlalakahle | <i>Aethomys chrysophilus</i> |
| R281 | 2014/08/07 | Hlalakahle | <i>Aethomys chrysophilus</i> |
| R282 | 2014/08/07 | Hlalakahle | <i>Aethomys chrysophilus</i> |

**Table S2:** Origin and list of samples on which circular consensus sequencing (CCS) and multilocus gene sequencing were performed.

| Sample ID | Origin      | Host Species               | <i>Msp2</i> gene<br>qPCR<br>Positive | Sequencing |          |
|-----------|-------------|----------------------------|--------------------------------------|------------|----------|
|           |             |                            |                                      | CCS        | Targeted |
| C5        | Hlalakahle  | Cattle                     | +                                    | Yes        | No       |
| C10       | Tlhavekisa  | Cattle                     | +                                    | Yes        | No       |
| C13       | Seville A   | Cattle                     | +                                    | Yes        | No       |
| C17       | Hlalakahle  | Cattle                     | +                                    | Yes        | No       |
| C38       | Tlhavekisa  | Cattle                     | +                                    | Yes        | No       |
| C42       | Seville B   | Cattle                     | +                                    | Yes        | Yes      |
| C47       | Hlalakahle  | Cattle                     | +                                    | Yes        | No       |
| C91       | Seville A   | Cattle                     | +                                    | Yes        | No       |
| C96       | Gottenburg  | Cattle                     | +                                    | Yes        | No       |
| D2        | Hluvukani   | Dog                        | +                                    | Yes        | Yes      |
| D3        | Hluvukani   | Dog                        | +                                    | No         | Yes      |
| D5        | Hluvukani   | Dog                        | +                                    | No         | Yes      |
| D6        | Hluvukani   | Dog                        | +                                    | Yes        | No       |
| D9        | Hluvukani   | Dog                        | +                                    | No         | Yes      |
| D13       | Hluvukani   | Dog                        | +                                    | Yes        | No       |
| D14       | Hluvukani   | Dog                        | +                                    | Yes        | No       |
| D21       | Hluvukani   | Dog                        | +                                    | Yes        | No       |
| D24       | Hluvukani   | Dog                        | +                                    | Yes        | Yes      |
| D25       | Hluvukani   | Dog                        | +                                    | Yes        | Yes      |
| D26       | Hluvukani   | Dog                        | +                                    | Yes        | No       |
| D27       | Hluvukani   | Dog                        | +                                    | No         | Yes      |
| D28       | Hluvukani   | Dog                        | +                                    | Yes        | Yes      |
| D33       | Hluvukani   | Dog                        | +                                    | No         | Yes      |
| D36       | Hluvukani   | Dog                        | +                                    | Yes        | Yes      |
| D37       | Hluvukani   | Dog                        | +                                    | No         | Yes      |
| H1        | Utha        | Human                      | -                                    | Yes        | No       |
| H4        | Welverdiend | Human                      | -                                    | Yes        | No       |
| H8        | Gottenburg  | Human                      | +                                    | Yes        | No       |
| H18       | Welverdiend | Human                      | +                                    | Yes        | No       |
| H27       | Welverdiend | Human                      | +                                    | Yes        | Yes      |
| H47       | Welverdiend | Human                      | +                                    | Yes        | Yes      |
| H53       | Utha        | Human                      | +                                    | Yes        | Yes      |
| H59       | Utha        | Human                      | +                                    | Yes        | Yes      |
| H69       | Utha        | Human                      | +                                    | Yes        | No       |
| R2        | Tlhavekisa  | <i>Mastomys coucha</i>     | -                                    | Yes        | No       |
| R5        | Tlhavekisa  | <i>Mastomys coucha</i>     | -                                    | Yes        | No       |
| R6        | Tlhavekisa  | <i>Mastomys coucha</i>     | -                                    | Yes        | No       |
| R11       | Tlhavekisa  | <i>Mastomys coucha</i>     | -                                    | Yes        | No       |
| R12       | Tlhavekisa  | <i>Mastomys coucha</i>     | -                                    | Yes        | No       |
| R19       | Gottenburg  | <i>Mastomys natalensis</i> | -                                    | Yes        | No       |
| R20       | Gottenburg  | <i>Mastomys natalensis</i> | -                                    | Yes        | No       |
| R21       | Manyeleti   | <i>Mastomys coucha</i>     | -                                    | Yes        | No       |
| R29       | Gottenburg  | <i>Mastomys natalensis</i> | -                                    | Yes        | No       |
| R30       | Gottenburg  | <i>Mastomys natalensis</i> | -                                    | Yes        | No       |
| R31       | Gottenburg  | <i>Mastomys natalensis</i> | -                                    | Yes        | No       |
| R53       | Manyeleti   | <i>Mastomys coucha</i>     | -                                    | Yes        | No       |
| R61       | Manyeleti   | <i>Mastomys coucha</i>     | -                                    | Yes        | No       |
| R74       | Hlalakahle  | <i>Mastomys natalensis</i> | -                                    | Yes        | No       |
| R75       | Hlalakahle  | <i>Mastomys natalensis</i> | +                                    | Yes        | No       |
| R78       | Hlalakahle  | <i>Mastomys natalensis</i> | +                                    | Yes        | No       |
| R84       | Tlhavekisa  | <i>Mastomys natalensis</i> | +                                    | Yes        | No       |
| R95       | Hlalakahle  | <i>Mastomys natalensis</i> | +                                    | Yes        | No       |
| R98       | Hlalakahle  | <i>Mastomys natalensis</i> | +                                    | Yes        | No       |
| R99       | Hlalakahle  | <i>Mastomys natalensis</i> | +                                    | Yes        | No       |
| R102      | Tlhavekisa  | <i>Rattus tanezumi</i>     | +                                    | No         | Yes      |



|             |            |                                 |   |     |     |
|-------------|------------|---------------------------------|---|-----|-----|
| <b>R103</b> | Tlhavekisa | <i>Mastomys natalensis</i>      | + | No  | Yes |
| <b>R104</b> | Tlhavekisa | <i>Mastomys natalensis</i>      | + | No  | Yes |
| <b>R105</b> | Tlhavekisa | <i>Mastomys natalensis</i>      | + | No  | Yes |
| <b>R124</b> | Hlalakahle | <i>Saccostomus campestris</i>   | + | No  | Yes |
| <b>R125</b> | Hlalakahle | <i>Gerbilliscus leucogaster</i> | + | No  | Yes |
| <b>R138</b> | Hlalakahle | <i>Gerbilliscus leucogaster</i> | + | No  | Yes |
| <b>R159</b> | Manyeleti  | <i>Mastomys coucha</i>          | + | Yes | No  |
| <b>R171</b> | Gottenburg | <i>Mastomys natalensis</i>      | + | Yes | No  |
| <b>R172</b> | Gottenburg | <i>Mastomys natalensis</i>      | + | Yes | No  |
| <b>R177</b> | Manyeleti  | <i>Mastomys coucha</i>          | + | Yes | No  |
| <b>R179</b> | Manyeleti  | <i>Mastomys coucha</i>          | + | Yes | No  |
| <b>RA1</b>  | Athol      | <i>Rhipicephalus sanguineus</i> | + | No  | Yes |
| <b>RA3</b>  | Athol      | <i>Rhipicephalus sanguineus</i> | + | No  | Yes |
| <b>RH1</b>  | Hluvukani  | <i>Rhipicephalus sanguineus</i> | + | No  | Yes |
| <b>RH3</b>  | Hluvukani  | <i>Rhipicephalus sanguineus</i> | + | No  | Yes |
| <b>RH8</b>  | Hluvukani  | <i>Rhipicephalus sanguineus</i> | + | No  | Yes |

+ Positive on qPCR assay

- Negative on qPCR assay

**Table S3:** Genbank accession numbers of sequences used in the phylogenetic analysis of the *Anaplasma* species.

| Accession number | Organism                                   | Strain/                    | Host                             |
|------------------|--------------------------------------------|----------------------------|----------------------------------|
| 16S rRNA         |                                            |                            |                                  |
| U02521           | <i>A. phagocytophilum</i>                  | Webster/US                 | Human                            |
| NC007797         | <i>A. phagocytophilum</i>                  | HZ/US                      | Human                            |
| CP006618         | <i>A. phagocytophilum</i>                  | Dog2/US                    | Dog                              |
| AF093789         | HGE agent                                  | US                         | Human                            |
| CP046391         | <i>A. platys</i> strain S3                 | Saint Kitts                | Dog                              |
| M82801           | <i>A. platys</i>                           | US                         | Dog                              |
| KT982643         | <i>A. platys</i>                           | India                      | Dog                              |
| LC269822         | <i>A. platys</i>                           | Zambia                     | Dog                              |
| AY570540         | <i>Anaplasma</i> sp. South Africa dog 1245 | South Africa               | Dog                              |
| AY570539         | <i>Anaplasma</i> sp. South Africa dog 1076 | South Africa               | Dog                              |
| LC269823         | <i>Anaplasma</i> sp. ZAM dog               | Zambia                     | Dog                              |
| MT918373         | <i>Anaplasma</i> sp. Southern Africa dog   | South Africa               | Black-backed jackal              |
| MT918374         | <i>Anaplasma</i> sp. Southern Africa dog   | South Africa               | Black-backed jackal              |
| KU586025         | <i>Candidatus Anaplasma</i> boleense       | WHANSP/China               | <i>Anopheles sinensis</i>        |
| KU586169         | <i>Candidatus Anaplasma</i> boleense       | WHANSA China               | <i>Anopheles sinensis</i>        |
| MF576175         | <i>Anaplasma</i> sp. Mymensingh            | Bangladesh                 | Cattle                           |
| KY924886         | Uncultured <i>Anaplasma</i> sp. Dedessa    | Ethiopia                   | Cattle                           |
| KJ410249         | <i>Anaplasma</i> sp. BL102-7               | China                      | <i>Hyalomma asiaticum</i>        |
| KP006405         | Uncultured <i>Anaplasma</i> sp. Dog9       | Philippines                | Dog                              |
| U03775           | <i>A. bovis</i>                            | South Africa               | Cattle                           |
| AF309869         | <i>A. centrale</i>                         | Strain Isreal              | Cattle                           |
| AY048816         | <i>A. marginale</i>                        | St. Maries                 | Cattle                           |
| AF414870         | <i>A. ovis</i>                             | South Africa               | Sheep                            |
| U54806           | <i>Anaplasma</i> sp. Omatjenne             | Namibia                    | <i>Hyalomma truncatum</i>        |
| KP314237         | <i>A. capra</i>                            | China                      | Tick                             |
| U11021           | <i>Rickettsia rickettsii</i>               | Sawtooth/US                | <i>Dermacentor andersoni</i>     |
| <i>gltA</i> gene |                                            |                            |                                  |
| AF304140         | <i>A. marginale</i>                        | Florida/US                 | Cattle                           |
| KJ410283         | <i>A. ovis</i>                             | China                      | Tick                             |
| CP001759         | <i>A. centrale</i>                         | Isreal                     | Cattle                           |
| KU586317         | <i>A. bovis</i>                            | China                      | <i>Aedes albopictus</i>          |
| AQW38804         | <i>A. bovis</i>                            | China                      | <i>Aedes albopictus</i>          |
| AF304137         | <i>A. phagocytophilum</i>                  | California/US              | Horse                            |
| CP015376         | <i>A. phagocytophilum</i>                  | Norway variant2/<br>Norway | Sheep                            |
| AGR81592         | <i>A. phagocytophilum</i>                  | Dog2/US                    | Dog                              |
| SCV65315         | <i>A. phagocytophilum</i>                  | France                     | Genome Assembly                  |
| AKZ20811         | <i>A. phagocytophilum</i>                  | Spain                      | <i>Ixodes</i> sp.                |
| KX987359         | <i>Candidatus Anaplasma</i> boleense       | WHBMXZ/China               | <i>Rhipicephalus microplus</i>   |
| KR261628         | <i>A. capra</i>                            | China                      | <i>Haemaphysalis longicornis</i> |
| KP861638         | <i>A. phagocytophilum</i>                  | NY18/US                    | <i>Ixodes</i> sp.                |
| KP861637         | <i>A. phagocytophilum</i>                  | DogL610/Germany            | <i>Ixodes</i> sp.                |
| CP046391         | <i>A. platys</i> strain S3                 | Saint Kitts                | Dog                              |
| DQ525687         | <i>A. platys</i>                           | Sicily/Italy               | Dog                              |
| LC269826         | <i>A. platys</i>                           | ZAM dog/Zambia             | Dog                              |
| AY570541         | <i>Anaplasma</i> sp. SA dog                | South Africa               | Dog                              |
| AAT74599         | <i>Anaplasma</i> sp. SA dog                | South Africa               | Dog                              |
| LC269827         | <i>Anaplasma</i> sp. ZAM dog               | Zambia                     | Dog                              |
| U59729           | <i>Rickettsia rickettsii</i>               | Iowa/US                    | Vero cells                       |

**Table S4:** Sample information for the 16S rRNA, *gltA*, *msp4* and *ankA* sequences generated in this study.

| Accession number | Sample ID | Species                                        | Origin     | Host                            | Sequence type |
|------------------|-----------|------------------------------------------------|------------|---------------------------------|---------------|
| <b>16S rRNA</b>  |           |                                                |            |                                 |               |
| MK814405         | D2-1      | <i>A. phagocytophilum</i>                      | Hluvukani  | Dog                             | Aph1/16S      |
| MK814406         | D2-2      | <i>A. phagocytophilum</i>                      | Hluvukani  | Dog                             | Aph1/16S      |
| MK814404         | D2-4      | <i>A. phagocytophilum</i>                      | Hluvukani  | Dog                             | Aph1/16S      |
| MK814402         | D2-5      | <i>A. phagocytophilum</i>                      | Hluvukani  | Dog                             | Aph1/16S      |
| MK814403         | D2-8      | <i>A. phagocytophilum</i>                      | Hluvukani  | Dog                             | Aph1/16S      |
| MK814410         | *D24      | <i>A. phagocytophilum</i>                      | Hluvukani  | Dog                             | Aph2/16S      |
| MK814412         | *D28      | <i>A. phagocytophilum</i>                      | Hluvukani  | Dog                             | Aph2/16S      |
| MK814407         | H59       | <i>A. phagocytophilum</i>                      | Hluvukani  | Human                           | Aph/1or2/16S  |
| MK814411         | *R98      | <i>A. phagocytophilum</i>                      | Hlalakahle | <i>Mastomys natalensis</i>      | Aph2/16S      |
| MK814408         | R102      | <i>A. phagocytophilum</i>                      | Thlavekisa | <i>Rattus tanezumi</i>          | Aph/1or2/16S  |
| MK814409         | R103      | <i>A. phagocytophilum</i>                      | Thlavekisa | <i>Mastomys natalensis</i>      | Aph/1or2/16S  |
| MK814426         | D3-1      | <i>Anaplasma</i> sp. SA dog                    | Hluvukani  | Dog                             | Adog1/16S     |
| MK814428         | D3-5      | <i>Anaplasma</i> sp. SA dog                    | Hluvukani  | Dog                             | Adog1/16S     |
| MK814425         | D3-6      | <i>Anaplasma</i> sp. SA dog                    | Hluvukani  | Dog                             | Adog1/16S     |
| MK814423         | D3-7      | <i>Anaplasma</i> sp. SA dog                    | Hluvukani  | Dog                             | Adog16S1      |
| MK814427         | D5-1      | <i>Anaplasma</i> sp. SA dog                    | Hluvukani  | Dog                             | Adog1/16S     |
| MK814441         | D9-6      | <i>Anaplasma</i> sp. SA dog                    | Hluvukani  | Dog                             | Adog2/16S     |
| MK814431         | D27-2     | <i>Anaplasma</i> sp. SA dog                    | Hluvukani  | Dog                             | Adog1/16S     |
| MK814435         | D27-9     | <i>Anaplasma</i> sp. SA dog                    | Hluvukani  | Dog                             | Adog2/16S     |
| MK814422         | D27-1     | <i>Anaplasma</i> sp. SA dog                    | Hluvukani  | Dog                             | Adog1/16S     |
| MK814429         | D27-13    | <i>Anaplasma</i> sp. SA dog                    | Hluvukani  | Dog                             | Adog1/16S     |
| MK814433         | D36-3     | <i>Anaplasma</i> sp. SA dog                    | Hluvukani  | Dog                             | Adog1/16S     |
| MK814432         | D36-9     | <i>Anaplasma</i> sp. SA dog                    | Hluvukani  | Dog                             | Adog1/16S     |
| MK814430         | D36-10    | <i>Anaplasma</i> sp. SA dog                    | Hluvukani  | Dog                             | Adog1/16S     |
| MK814434         | D36-11    | <i>Anaplasma</i> sp. SA dog                    | Hluvukani  | Dog                             | Adog1/16S     |
| MK814446         | D37-1     | <i>Anaplasma</i> sp. SA dog                    | Hluvukani  | Dog                             | Adog1/16S     |
| MK814447         | D37-4     | <i>Anaplasma</i> sp. SA dog                    | Hluvukani  | Dog                             | Adog1/16S     |
| MK814424         | D37-8     | <i>Anaplasma</i> sp. SA dog                    | Hluvukani  | Dog                             | Adog1/16S     |
| MK814445         | D37-9     | <i>Anaplasma</i> sp. SA dog                    | Hluvukani  | Dog                             | Adog1/16S     |
| MK814436         | D3        | <i>Anaplasma</i> sp. SA dog                    | Hluvukani  | Dog                             | Adog2/16S     |
| MK814438         | D5        | <i>Anaplasma</i> sp. SA dog                    | Hluvukani  | Dog                             | Adog2/16S     |
| MK814443         | D27       | <i>Anaplasma</i> sp. SA dog                    | Hluvukani  | Dog                             | Adog2/16S     |
| MK814439         | *D36      | <i>Anaplasma</i> sp. SA dog                    | Hluvukani  | Dog                             | Adog2/16S     |
| MK814437         | D37       | <i>Anaplasma</i> sp. SA dog                    | Hluvukani  | Dog                             | Adog2/16S     |
| MK814442         | RA3       | <i>Anaplasma</i> sp. SA dog                    | Athol      | <i>Rhipicephalus sanguineus</i> | Adog2/16S     |
| MK814440         | RH3       | <i>Anaplasma</i> sp. SA dog                    | Hluvukani  | <i>Rhipicephalus sanguineus</i> | Adog2/16S     |
| MK814444         | RH8       | <i>Anaplasma</i> sp. SA dog                    | Hluvukani  | <i>Rhipicephalus sanguineus</i> | Adog2/16S     |
| MK814416         | D25-2     | <i>A. platys</i>                               | Hluvukani  | Dog                             | Apla1/16S     |
| MK814419         | D25-5     | <i>A. platys</i>                               | Hluvukani  | Dog                             | Apla1/16S     |
| MK814414         | D25-6     | <i>A. platys</i>                               | Hluvukani  | Dog                             | Apla1/16S     |
| MK814417         | D25-8     | <i>A. platys</i>                               | Hluvukani  | Dog                             | Apla1/16S     |
| MK814418         | D25-9     | <i>A. platys</i>                               | Hluvukani  | Dog                             | Apla1/16S     |
| MK814415         | D33-3     | <i>A. platys</i>                               | Hluvukani  | Dog                             | Apla1/16S     |
| MK814421         | D33-4     | <i>A. platys</i>                               | Hluvukani  | Dog                             | Apla1/16S     |
| MK814420         | D33-5     | <i>A. platys</i>                               | Hluvukani  | Dog                             | Apla1/16S     |
| MK814413         | D33-7     | <i>A. platys</i>                               | Hluvukani  | Dog                             | Apla1/16S     |
| MK814448         | *C5       | <i>Anaplasma</i> sp.<br>Mymensingh             | Hlalakahle | Cattle                          | Asm1/16S      |
| MK814450         | *C13      | <i>Candidatus Anaplasma</i><br><i>boleense</i> | Seville A  | Cattle                          | Cab1/16S      |
| MK814449         | *C91      | <i>Anaplasma</i> sp.<br>Mymensingh             | Seville A  | Cattle                          | Asm1/16S      |

| <b>GltA</b> |         |                             |            |                                 |            |
|-------------|---------|-----------------------------|------------|---------------------------------|------------|
| MK804077    | D24     | <i>A. phagocytophilum</i>   | Hluvukani  | Dog                             | Aph1/GltA  |
| MK804079    | D25     | <i>A. phagocytophilum</i>   | Hluvukani  | Dog                             | Aph1/GltA  |
| MK804078    | D28     | <i>A. phagocytophilum</i>   | Hluvukani  | Dog                             | Aph1/GltA  |
| MK804080    | R102    | <i>A. phagocytophilum</i>   | Thlavekisa | <i>Rattus tanezumi</i>          | Aph1/GltA  |
| MK804081    | D36     | <i>Anaplasma</i> sp. SA dog | Hluvukani  | Dog                             | Adog1/GltA |
| <b>Msp4</b> |         |                             |            |                                 |            |
| MK804088    | D3      | <i>Anaplasma</i> sp.        | Hluvukani  | Dog                             | AspM/Msp4  |
| MK804089    | D33     | <i>Anaplasma</i> sp.        | Hluvukani  | Dog                             | AspM/Msp4  |
| MK804096    | R102    | <i>Anaplasma</i> sp.        | Thlavekisa | <i>Rattus tanezumi</i>          | AspM/Msp4  |
| MK804097    | R102-8  | <i>Anaplasma</i> sp.        | Thlavekisa | <i>Rattus tanezumi</i>          | AspM/Msp4  |
| MK804099    | R102-10 | <i>Anaplasma</i> sp.        | Thlavekisa | <i>Rattus tanezumi</i>          | AspM/Msp4  |
| MK804093    | R103    | <i>Anaplasma</i> sp.        | Thlavekisa | <i>Mastomys natalensis</i>      | AspM/Msp4  |
| MK804098    | R103-8  | <i>Anaplasma</i> sp.        | Thlavekisa | <i>Mastomys natalensis</i>      | AspM/Msp4  |
| MK804103    | R104-7  | <i>Anaplasma</i> sp.        | Thlavekisa | <i>Mastomys natalensis</i>      | AspM/Msp4  |
| MK804092    | R105    | <i>Anaplasma</i> sp.        | Thlavekisa | <i>Mastomys natalensis</i>      | AspM/Msp4  |
| MK804102    | R105-4  | <i>Anaplasma</i> sp.        | Thlavekisa | <i>Mastomys natalensis</i>      | AspM/Msp4  |
| MK804100    | R105-5  | <i>Anaplasma</i> sp.        | Thlavekisa | <i>Mastomys natalensis</i>      | AspM/Msp4  |
| MK804083    | R124    | <i>Anaplasma</i> sp.        | Hlalakahle | <i>Saccostomus</i> sp.          | AspM/Msp4  |
| MK804101    | R125-2  | <i>Anaplasma</i> sp.        | Hlalakahle | <i>Gerbillicus leucogaster</i>  | AspM/Msp4  |
| MK804087    | R138    | <i>Anaplasma</i> sp.        | Hlalakahle | <i>Gerbillicus leucogaster</i>  | AspM/Msp4  |
| MK804094    | H27     | <i>Anaplasma</i> sp.        | Hluvukani  | Human                           | AspM/Msp4  |
| MK804104    | H47     | <i>Anaplasma</i> sp.        | Hluvukani  | Human                           | AspM/Msp4  |
| MK804085    | H53     | <i>Anaplasma</i> sp.        | Hluvukani  | Human                           | AspM/Msp4  |
| MK804086    | RA1     | <i>Anaplasma</i> sp.        | Athol      | <i>Rhipicephalus sanguineus</i> | AspM/Msp4  |
| MK804095    | RH1     | <i>Anaplasma</i> sp.        | Hluvukani  | <i>Rhipicephalus sanguineus</i> | AspM/Msp4  |
| MK804082    | RH3     | <i>Anaplasma</i> sp.        | Hluvukani  | <i>Rhipicephalus sanguineus</i> | AspM/Msp4  |
| MK804091    | RA3     | <i>Anaplasma</i> sp.        | Athol      | <i>Rhipicephalus sanguineus</i> | AspM/Msp4  |
| MK804084    | RH8     | <i>Anaplasma</i> sp.        | Hluvukani  | <i>Rhipicephalus sanguineus</i> | AspM/Msp4  |
| MK804090    | C42     | <i>Anaplasma</i> sp.        | Seville B  | Cattle                          | AspM/Msp4  |
| <b>AnkA</b> |         |                             |            |                                 |            |
| MK804106    | D3      | <i>Anaplasma</i> sp.        | Hluvukani  | Dog                             | AspA/AnkA  |
| MK804109    | D33     | <i>Anaplasma</i> sp.        | Hluvukani  | Dog                             | AspA/AnkA  |
| MK804108    | D36     | <i>Anaplasma</i> sp.        | Hluvukani  | Dog                             | AspA/AnkA  |
| MK804105    | R102    | <i>Anaplasma</i> sp.        | Thlavekisa | <i>Rattus tanezumi</i>          | AspA/AnkA  |
| MK804110    | R103    | <i>Anaplasma</i> sp.        | Thlavekisa | <i>Mastomys natalensis</i>      | AspA/AnkA  |
| MK804107    | R124    | <i>Anaplasma</i> sp.        | Hlalakahle | <i>Saccostomus</i> sp.          | AspA/AnkA  |
| MK804111    | RH1     | <i>Anaplasma</i> sp.        | Hluvukani  | <i>Rhipicephalus sanguineus</i> | AspA/AnkA  |

\*Sequences were extracted from data generated from the characterization of the bacterial blood microbiome of dogs, cattle and rodents in the Mnisi community area, Mpumalanga Province South Africa.

*msp2*

|                           |        |       |           |             |
|---------------------------|--------|-------|-----------|-------------|
|                           |        | 1     |           | 80          |
| <i>A. platys</i>          | (1)    | ATGA  | ---       | AGGAAAGAAA  |
| <i>A. phagocytophilum</i> | (1)    | ATGA  | GAAA      | AGGAAAGATAA |
|                           |        | 81    |           | 160         |
| <i>A. platys</i>          | (77)   | CGG   | CA        | GGGTCG      |
| <i>A. phagocytophilum</i> | (79)   | ---   | CATGAT    | --GACGTTAG  |
|                           |        | 161   |           | 240         |
| <i>A. platys</i>          | (157)  | AGT   | AAGATAA   | ATGGTTT     |
| <i>A. phagocytophilum</i> | (154)  | AGC   | AAGATAA   | GAGATTT     |
|                           |        | 241   |           | 320         |
| <i>A. platys</i>          | (237)  | AGT   | GGAGTGGAA | AGCTGAG     |
| <i>A. phagocytophilum</i> | (234)  | TGT   | AAAGCTAG  | AGTACACA    |
|                           |        | 321   |           | 400         |
| <i>A. platys</i>          | (317)  | TAGA  | AGGAAGTGT | GGCCTAC     |
| <i>A. phagocytophilum</i> | (314)  | TG    | GAAGGC    | CAGTGTGG    |
|                           |        | 401   |           | 480         |
| <i>A. platys</i>          | (397)  | ATA   | AGAGATA   | CGGCAAG     |
| <i>A. phagocytophilum</i> | (394)  | AT    | TAGAGATA  | GTGGTAG     |
|                           |        | 481   |           | 560         |
| <i>A. platys</i>          | (477)  | TGAC  | CAGAGC    | GATAAAT     |
| <i>A. phagocytophilum</i> | (474)  | TG    | CAGACT    | GATAAGCT    |
|                           |        | 561   |           | 640         |
| <i>A. platys</i>          | (557)  | CAT   | GGCAAAG   | GATATT      |
| <i>A. phagocytophilum</i> | (554)  | TT    | TCAGCCCT  | GAAATT      |
|                           |        | 641   |           | 720         |
| <i>A. platys</i>          | (632)  | ----- | CGCAGAC   | TGGCAG      |
| <i>A. phagocytophilum</i> | (633)  | TG    | CGGAGTTGT | CGACGAC     |
|                           |        | 721   |           | 800         |
| <i>A. platys</i>          | (690)  | ---   | AGACGTA   | -----       |
| <i>A. phagocytophilum</i> | (712)  | CCA   | AGACGTT   | AGTGGTTT    |
|                           |        | 801   |           | 880         |
| <i>A. platys</i>          | (741)  | C     | GC        | TGCGAA      |
| <i>A. phagocytophilum</i> | (792)  | CAG   | CAGTC     | AAAAC       |
|                           |        | 881   |           | 960         |
| <i>A. platys</i>          | (797)  | AAA   | GAA       | CAAG        |
| <i>A. phagocytophilum</i> | (872)  | AAAA  | AACCA     | TAGTAG      |
|                           |        | 961   |           | 1040        |
| <i>A. platys</i>          | (877)  | TC    | AGTAAT    | GTGAAT      |
| <i>A. phagocytophilum</i> | (952)  | TCT   | GTAAT     | GTGAAT      |
|                           |        | 1041  |           | 1120        |
| <i>A. platys</i>          | (957)  | TA    | ACTTCGT   | TGGCA       |
| <i>A. phagocytophilum</i> | (1032) | TA    | ACTTCGT   | AGGTG       |
|                           |        | 1121  |           | 1200        |
| <i>A. platys</i>          | (1037) | CG    | CCG       | AAATCT      |
| <i>A. phagocytophilum</i> | (1112) | CT    | CC        | TGAAATCT    |
|                           |        | 1201  |           | 1280        |
| <i>A. platys</i>          | (1117) | AG    | GCTGT     | TAGACG      |
| <i>A. phagocytophilum</i> | (1192) | CG    | TCTGT     | TAGATG      |
|                           |        | 1281  |           | 1308        |
| <i>A. platys</i>          | (1194) | TGA   | A         | TCGGT       |
| <i>A. phagocytophilum</i> | (1272) | GGA   | A         | TTGGT       |

**Figure S1:** Alignment of *msp2* sequences from *A. platys* and *A. phagocytophilum*. The *A. platys* sequence corresponds to accession # GU357491, while the *A. phagocytophilum* sequence was taken from the expression site of the HGE1 strain genome (Accession # APHH0000000). The underlined regions show the primers used in the study. The reverse complement (rc) of the reverse primer is underlined. The TaqMan probe is double underlined. The numbers above each row indicate the alignment position number. The numbers at the start of each row in parentheses indicate the base number of the first base on that row for that sequence. Only two sequences are shown because the primers do not sit in the variable region of this gene.

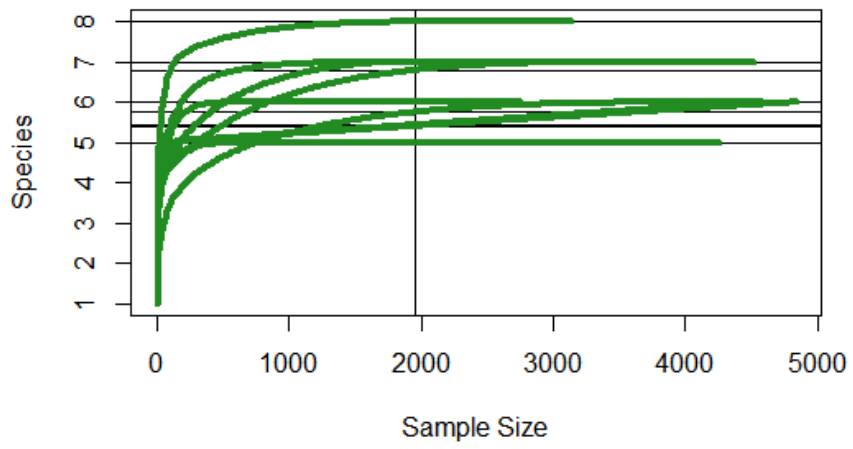

**Figure S2:** Representative rarefaction curves from samples tested. The mean species diversity of bacterial populations was plotted as a function of read depth. The vertical line in the plot indicates the value where rarefaction criterion was satisfied.

msp4

|        |       |                                                                                   |                   |     |
|--------|-------|-----------------------------------------------------------------------------------|-------------------|-----|
|        |       | 1                                                                                 |                   | 80  |
| AmStM  | (1)   | ATGAATTACAGAGAATTGTTTACAGGGGGCCGTGCAGCAGCCACAGTCTGCGCTGCTCCCTACTTGTAGTGGGGCCGT    |                   |     |
| AcIs   | (1)   | ATGAATTACAGAGAATTGTTTACAGGGGGCCGTGCAGCAGCCACAGTCTGCGCTGCTCCCTACTTGTAGTGGGGCCGT    |                   |     |
| AoHa   | (1)   | ATGAATTACAGAGAATTGTTTACAGGGGGCCGTGCAGCAGCCACAGTCTGCGCTGCTCCCTACTTGTAGTGGGGCCGT    |                   |     |
| ApI    | (1)   | ATGAATTACAGAGAATTACTTGTAGGAGCTTGTCTGCTATGGCAGTCTGCGCATGCTCTCTACAGTTAGTGAATCCTC    |                   |     |
| ApHGE1 | (1)   | ATGAATTACAGAGAATTGCTTGTAGGAGCCTATCTGCGGGCCAGTATGTGCTGCTCCCTTTAAATAGTGGATCCTC      |                   |     |
| ApHZ   | (1)   | ATGAATTACAGAGAATTGCTTGTAGGAGCCTATCTGCGGGCCAGTATGTGCTGCTCCCTTTAAATAGTGGATCCTC      |                   |     |
|        |       | 81                                                                                |                   | 160 |
| AmStM  | (81)  | AGTGGCATCTCCATGAGTCAAGAACTGGCTTCTGAAGGG---GGAGTAATGGGAGGTAGCTTTTACGTGGGTGCGGCT    |                   |     |
| AcIs   | (81)  | AGTAGCCTCCCATGAGTCAAGAACTGGCTTCTGAAGGG---GGAGTAATGGGAGGTAGCTTTTATGTAGCACAGCTT     |                   |     |
| AoHa   | (81)  | AGTGGCGTCTCCATGAGTCAAGAACTGGCTTCTGAAGGGGGTTCATGGGAGGTAGCTTTTATGTAGTGGCGCTT        |                   |     |
| ApI    | (81)  | ATTGGCGTCTCCATGAGTCAAGAACTGGCTTCTGAAGGGGGTTCATGGGAGGTAGCTTTTATGTAGTGGCGCTT        |                   |     |
| ApHGE1 | (81)  | ATTTGCGTATTCAGGCAATAATGATGCG---TCTGATGTTAGCGGTGTTATGAACGGCAGCTTTTACGTAAGTGGTAGCT  |                   |     |
| ApHZ   | (81)  | ATTTGCGTATTCAGGCAATAATGATGCG---TCTGATGTTAGCGGTGTTATGAACGGCAGCTTTTACGTAAGTGGTAGCT  |                   |     |
|        |       | 161                                                                               | AB1692F           | 240 |
| AmStM  | (158) | ACAGCCAGCAATTCCTTCTGTACCTCGTTCCAGATGCGTGAAGTCAAGCAAAGAGACCTCATACGTTAGGGCTATGAC    |                   |     |
| AcIs   | (161) | ACAGCCAGCAATTCCTTCTGTACCTCGTTCCAGATGCGTGAAGTCAAGCAAAGAGACCTCATACGTTAGGGCTATGAC    |                   |     |
| AoHa   | (161) | ACAGCCAGCAATTCCTTCTGTACCTCATTTCCAGATGCGTGAAGTCAAGCAAAGAGACCTCATACGTTAGGGCTATGAC   |                   |     |
| ApI    | (161) | ACAGTCCAACTTTCCTTCCATTAATCTTTTTCAGATGAGGGAATCTGGTCTGTATAGTCTTACGTTAAAGGATCCTC     |                   |     |
| ApHGE1 | (158) | ACAGTCCGTCATTCCTTCTATATCTTCATTTGCTATTAGTGAAGTCAAGCAAAGAGACCTCATACGTTAAAGGATTAAC   |                   |     |
| ApHZ   | (158) | ACAGTCCGTCATTCCTTCTATATCTTCATTTGCTATTAGTGAAGTCAAGCAAAGAGACCTCATACGTTAAAGGATTAAC   |                   |     |
|        |       | 241                                                                               |                   | 320 |
| AmStM  | (238) | AAGAGCCTTGCAACGATTGATGTGAGTGTGCGGCAACTTTTCCAAATCTGGCTACACTTTTGCCTTCTTAAGAACTT     |                   |     |
| AcIs   | (241) | AAGAGCCTTGCAACGATTGATGTGAGTGTGCGGCAACTTTTCCAAATCTGGCTACACTTTTGCCTTCTTAAGAACTT     |                   |     |
| AoHa   | (241) | AAGAGCCTTGCAACGATTGATGTGAGTGTGCGGCAACTTTTCCAAATCTGGCTACACTTTTGCCTTCTTAAGAACTT     |                   |     |
| ApI    | (241) | AAAACCGCTCTACACTCAATATCTCGCAACTGAAACTTCAATCAAGAGGACACACTTTTAAATTTGCAAAAGAACTT     |                   |     |
| ApHGE1 | (238) | AAGAATTTGAGCACCTTGAATGTTTCAGATCTGCCAGCTTCAAGCAAAGTCAAGTATCCCTCATTCAAGTTGCTAAGGTTT |                   |     |
| ApHZ   | (238) | AAGAATTTGAGCACCTTGAATGTTTCAGATCTGCCAGCTTCAAGCAAAGTCAAGTATCCCTCATTCAAGTTGCTAAGGTTT |                   |     |
|        |       | 321                                                                               |                   | 400 |
| AmStM  | (318) | AATCACATCTTTGACGGCGCTGTGGATATTTCTCTAGGAGGAGCCAGAGTGAATTGAAGCGAGCTACAGAAAGTTTG     |                   |     |
| AcIs   | (321) | ACTTAGCTCTTTGATGGTGTGTGGATATTTCTCTAGGAGGAGCCAGAGTGAATTGAAGCGAGCTACAGAAAGTTTG      |                   |     |
| AoHa   | (321) | ACTCACATCTTTGACGGCGCTGTGGATATTTCTCTAGGAGGAGCTAGAGTGAATTGAAGCGAGCTACAGAAAGTTTG     |                   |     |
| ApI    | (321) | GCTAACATCTTTGAGGGAGCTGCAAGTTATGCAATGGCGGTGCTAGAGTGAAGTGAAGCTGGATACAAAATTTTG       |                   |     |
| ApHGE1 | (318) | ACTAACATCTTTGACGGTGAACCTGGCTATGCTATTGGCGGAGCTAGAGTGAAGTGAAGTGGATATAAAAAGTTTG      |                   |     |
| ApHZ   | (318) | ACTAACATCTTTGACGGTGAACCTGGCTATGCTATTGGCGGAGCTAGAGTGAAGTGAAGTGGATATAAAAAGTTTG      |                   |     |
|        |       | 401                                                                               |                   | 480 |
| AmStM  | (398) | CTACTTTGGCGGACGGGCACTACCGCAAAAGTGGTGGGAATCTCTGGCAGCTATTACCGCGACCGTAAACATTA        |                   |     |
| AcIs   | (401) | CTACTTTGGCGGACGGGCACTACCGCAAAAGTGGTGGGAATCTCTGGCAGCTATTACCGCGAGCTGCGTCACTGCA      |                   |     |
| AoHa   | (401) | CTACTTTAGCGGACGGGCACTACCGCAAAAGTGGTGGGAATCTCTGGCAGCTATTACCGCGAGCTGCGTCACTGCA      |                   |     |
| ApI    | (401) | CTGCTACTTCTGATGTGGATTACAAAATGCGAGATGCTCATCAGTTCGTCGGTATAGGACGTTGAACAGTATTCGACAG   |                   |     |
| ApHGE1 | (398) | AAACGCTCGCTGAAAGTGAATGTTTCAGATCTGCCAGCTTCAAGCAAAGTCAAGTATCCCTCATTCAAGTTGCTAAGGTTT |                   |     |
| ApHZ   | (398) | AAACGCTCGCTGAAAGTGAATGTTTCAGATCTGCCAGCTTCAAGCAAAGTCAAGTATCCCTCATTCAAGTTGCTAAGGTTT |                   |     |
|        |       | 481                                                                               |                   | 560 |
| AmStM  | (478) | ACCAATTAATTTGATGAAATTCACAAACACCTCAGTCAATGAAATGGCTGCTATGACGTTGTCACAC               |                   |     |
| AcIs   | (481) | ACCAATTAATTTGATGAAATTCACAAACACCTCAGTCAATGAAATGGCTGCTATGACGTTGTCACAC               |                   |     |
| AoHa   | (481) | AACAATTAATTTGATGAAATTCACAAACACCTCAGTCAATGAAATGGCTGCTATGACGTTGTCACAC               |                   |     |
| ApI    | (481) | CGAAATTAATTTGATGAAATTCACAAACACCTCAGTCAATGAAATGGCTGCTATGACGTTGTCACAC               |                   |     |
| ApHGE1 | (478) | GACAACTTCTTTGTAATGAAATAGACAGCGTCAAGATATATCTGTAATGCTTAACTGTTTACGACGTTATGCATAC      |                   |     |
| ApHZ   | (478) | GACAACTTCTTTGTAATGAAATAGACAGCGTCAAGATATATCTGTAATGCTTAACTGTTTACGACGTTATGCATAC      |                   |     |
|        |       | 561                                                                               |                   | 640 |
| AmStM  | (558) | AGATTACCTGTGTCCTCGTATGATGTCGGGATAGGCGAAGCTTTGTTGACATCTCTAAGCAAGTAAACCAAAAGC       |                   |     |
| AcIs   | (561) | GGATTTCCTGTGTCCTCGTATGATGTCGGGATAGGCGAAGCTTTGTTGACATCTCTAAGCAAGTAAACCAAAAGC       |                   |     |
| AoHa   | (561) | AGATTTCCTGTGTCCTCGTATGATGTCGGGATAGGCGAAGCTTTGTTGACATCTCTAAGCAAGTAAACCAAAAGC       |                   |     |
| ApI    | (561) | TGATTTCCTGTGTCCTCGTATGATGTCGGGATAGGCGAAGCTTTGTTGACATCTCTAAGCAAGTAAACCAAAAGC       |                   |     |
| ApHGE1 | (558) | TGACTTCCTGTATCTCCTTACATGTTGCTGGTTAGGGGGAGCTTTAATAATATGCCGATCACGTTAAGTAAAGT        |                   |     |
| ApHZ   | (558) | TGACTTCCTGTATCTCCTTACATGTTGCTGGTTAGGGGGAGCTTTAATAATATGCCGATCACGTTAAGTAAAGT        |                   |     |
|        |       | 641                                                                               |                   | 720 |
| AmStM  | (638) | TGGCTTACAGGGCAAGGTTGGATTAGTACCAGTTTACTCCGAAATATCCTTGGTGGCAAGTGGGTTCTACCACGGG      |                   |     |
| AcIs   | (641) | TAGCCTACAGAGGTAAAGGTTGGATAAGTACCAGTTTACTCCGAAATATCCTTGGTGGCAAGTGGGTTCTACCATGGA    |                   |     |
| AoHa   | (641) | TAGCCTACAGGGCAAGGTTGGAACTAGTACCAGTTTACTCCGAAATATCCTTGGTGGTAAGTGGGTTCTACCACGGA     |                   |     |
| ApI    | (641) | TAGCTTACAAAGGTAAAGTGGTGTAGTACCAGTTTACTCCGAAATATCCTTGGTGGTAAAGTGGGTTTACCATGCG      |                   |     |
| ApHGE1 | (638) | TGGCTTATAGAGGAAAGGTAAGCGTAAAGTTTACTCCTGAAATATCCTTAAATAGCTGGAGGTTTTTACCACGGA       |                   |     |
| ApHZ   | (638) | TGGCTTATAGAGGAAAGGTAAGCGTAAAGTTTACTCCTGAAATATCCTTAAATAGCTGGAGGTTTTTACCACGGA       |                   |     |
|        |       | 721                                                                               |                   | 800 |
| AmStM  | (718) | CTATTTGATGATCTTCAAGGACATTCCTCCGACACAAACAGTGTAAAGTTCTCTGGAGAAGCAAAAGCCTCAGTCAAAGC  |                   |     |
| AcIs   | (721) | CTTTTGCAGAACTTATAAGGACATTCCTCCGACACAAACAGTGTAAAGTTCTCCTGGAGAAGCAAAAGCCTCAATCAAAGC |                   |     |
| AoHa   | (721) | CTTTTGCAGAACTTATAAGGACATTCCTCCGACACAAACAGTGTAAAGTTCTCCTGGAGAAGCAAAAGCCTCAGTCAAAGC |                   |     |
| ApI    | (721) | CTATTTGATGAAAGTTTCAAGAACTTCTGCAAACTAAGGTAAGTTCTGCTGGTGAAGCTTTGGCAACAGTGAAGGC      |                   |     |
| ApHGE1 | (718) | ATTTTGCATGAAAGTATGCAAGTATTCCTCCGCTAGTAACTGTAACATAGCAGGTTGGTGTGCAAGCAAGGTAAGGC     |                   |     |
| ApHZ   | (718) | ATTTTGCATGAAAGTATGCAAGTATTCCTCCGCTAGTAACTGTAACATAGCAGGTTGGTGTGCAAGCAAGGTAAGGC     |                   |     |
|        |       | 801                                                                               | 852 rc of AB1693R |     |
| AmStM  | (798) | GCATATTGCTGACTACGGCTTTAACTTGGAGCAAGATTCTGTTTCAAGCTAA                              |                   |     |
| AcIs   | (801) | GCACGTTGCTGATTACGGCTTTAACTTGGAGCAAGATTCTGTTTCAAGCTAA                              |                   |     |
| AoHa   | (801) | ACATATTGCTGATTACGGCTTTAACTTGGAGCAAGATTCTGTTTCAAGCTAA                              |                   |     |
| ApI    | (801) | TAACTTGCAGAACTTATGATTCAATCTGGAGCAAGATTCTGTTTCAAGCTAA                              |                   |     |
| ApHGE1 | (798) | AAATATAGCTAGTTACGGCTTCAACATAGGAGCAAGATTCTTTCATTA                                  |                   |     |
| ApHZ   | (798) | AAATATAGCTAGTTACGGCTTCAACATAGGAGCAAGATTCTTTCATTA                                  |                   |     |

**Figure S3:** Alignment of *msp4* sequences from several species of *Anaplasma*. The sequences were taken from genome sequences for each species. Abbreviations and genome accession numbers are as follows: AmStM = *A. marginale* St. Maries strain (CP000030); AcIs = *A. centrale* Israel strain (CP001759); AoHa = *A. ovis* Haibei strain (CP015994); Apl = *A. platys* S3 strain (CP046391); ApHGE1 = *A. phagocytophilum* HGE1 strain (APHH00000000); ApHZ = *A. phagocytophilum* HZ strain (CP000235). The underlined regions show the primers used in the study. The reverse complement (rc) of the reverse primer is underlined. The numbers above each row indicate the alignment position number. The numbers at the start of each row in parentheses indicate the base number of the first base on that row for that sequence.
